# Supplementary figures and images for: Iron(ii) coordination pyrazole complexes with aromatic sulfonate ligands: the role of ether
Source: Royal Society of Chemistry journal article supplement (doi:10.1039/d0nj02823a), 2020-01-01

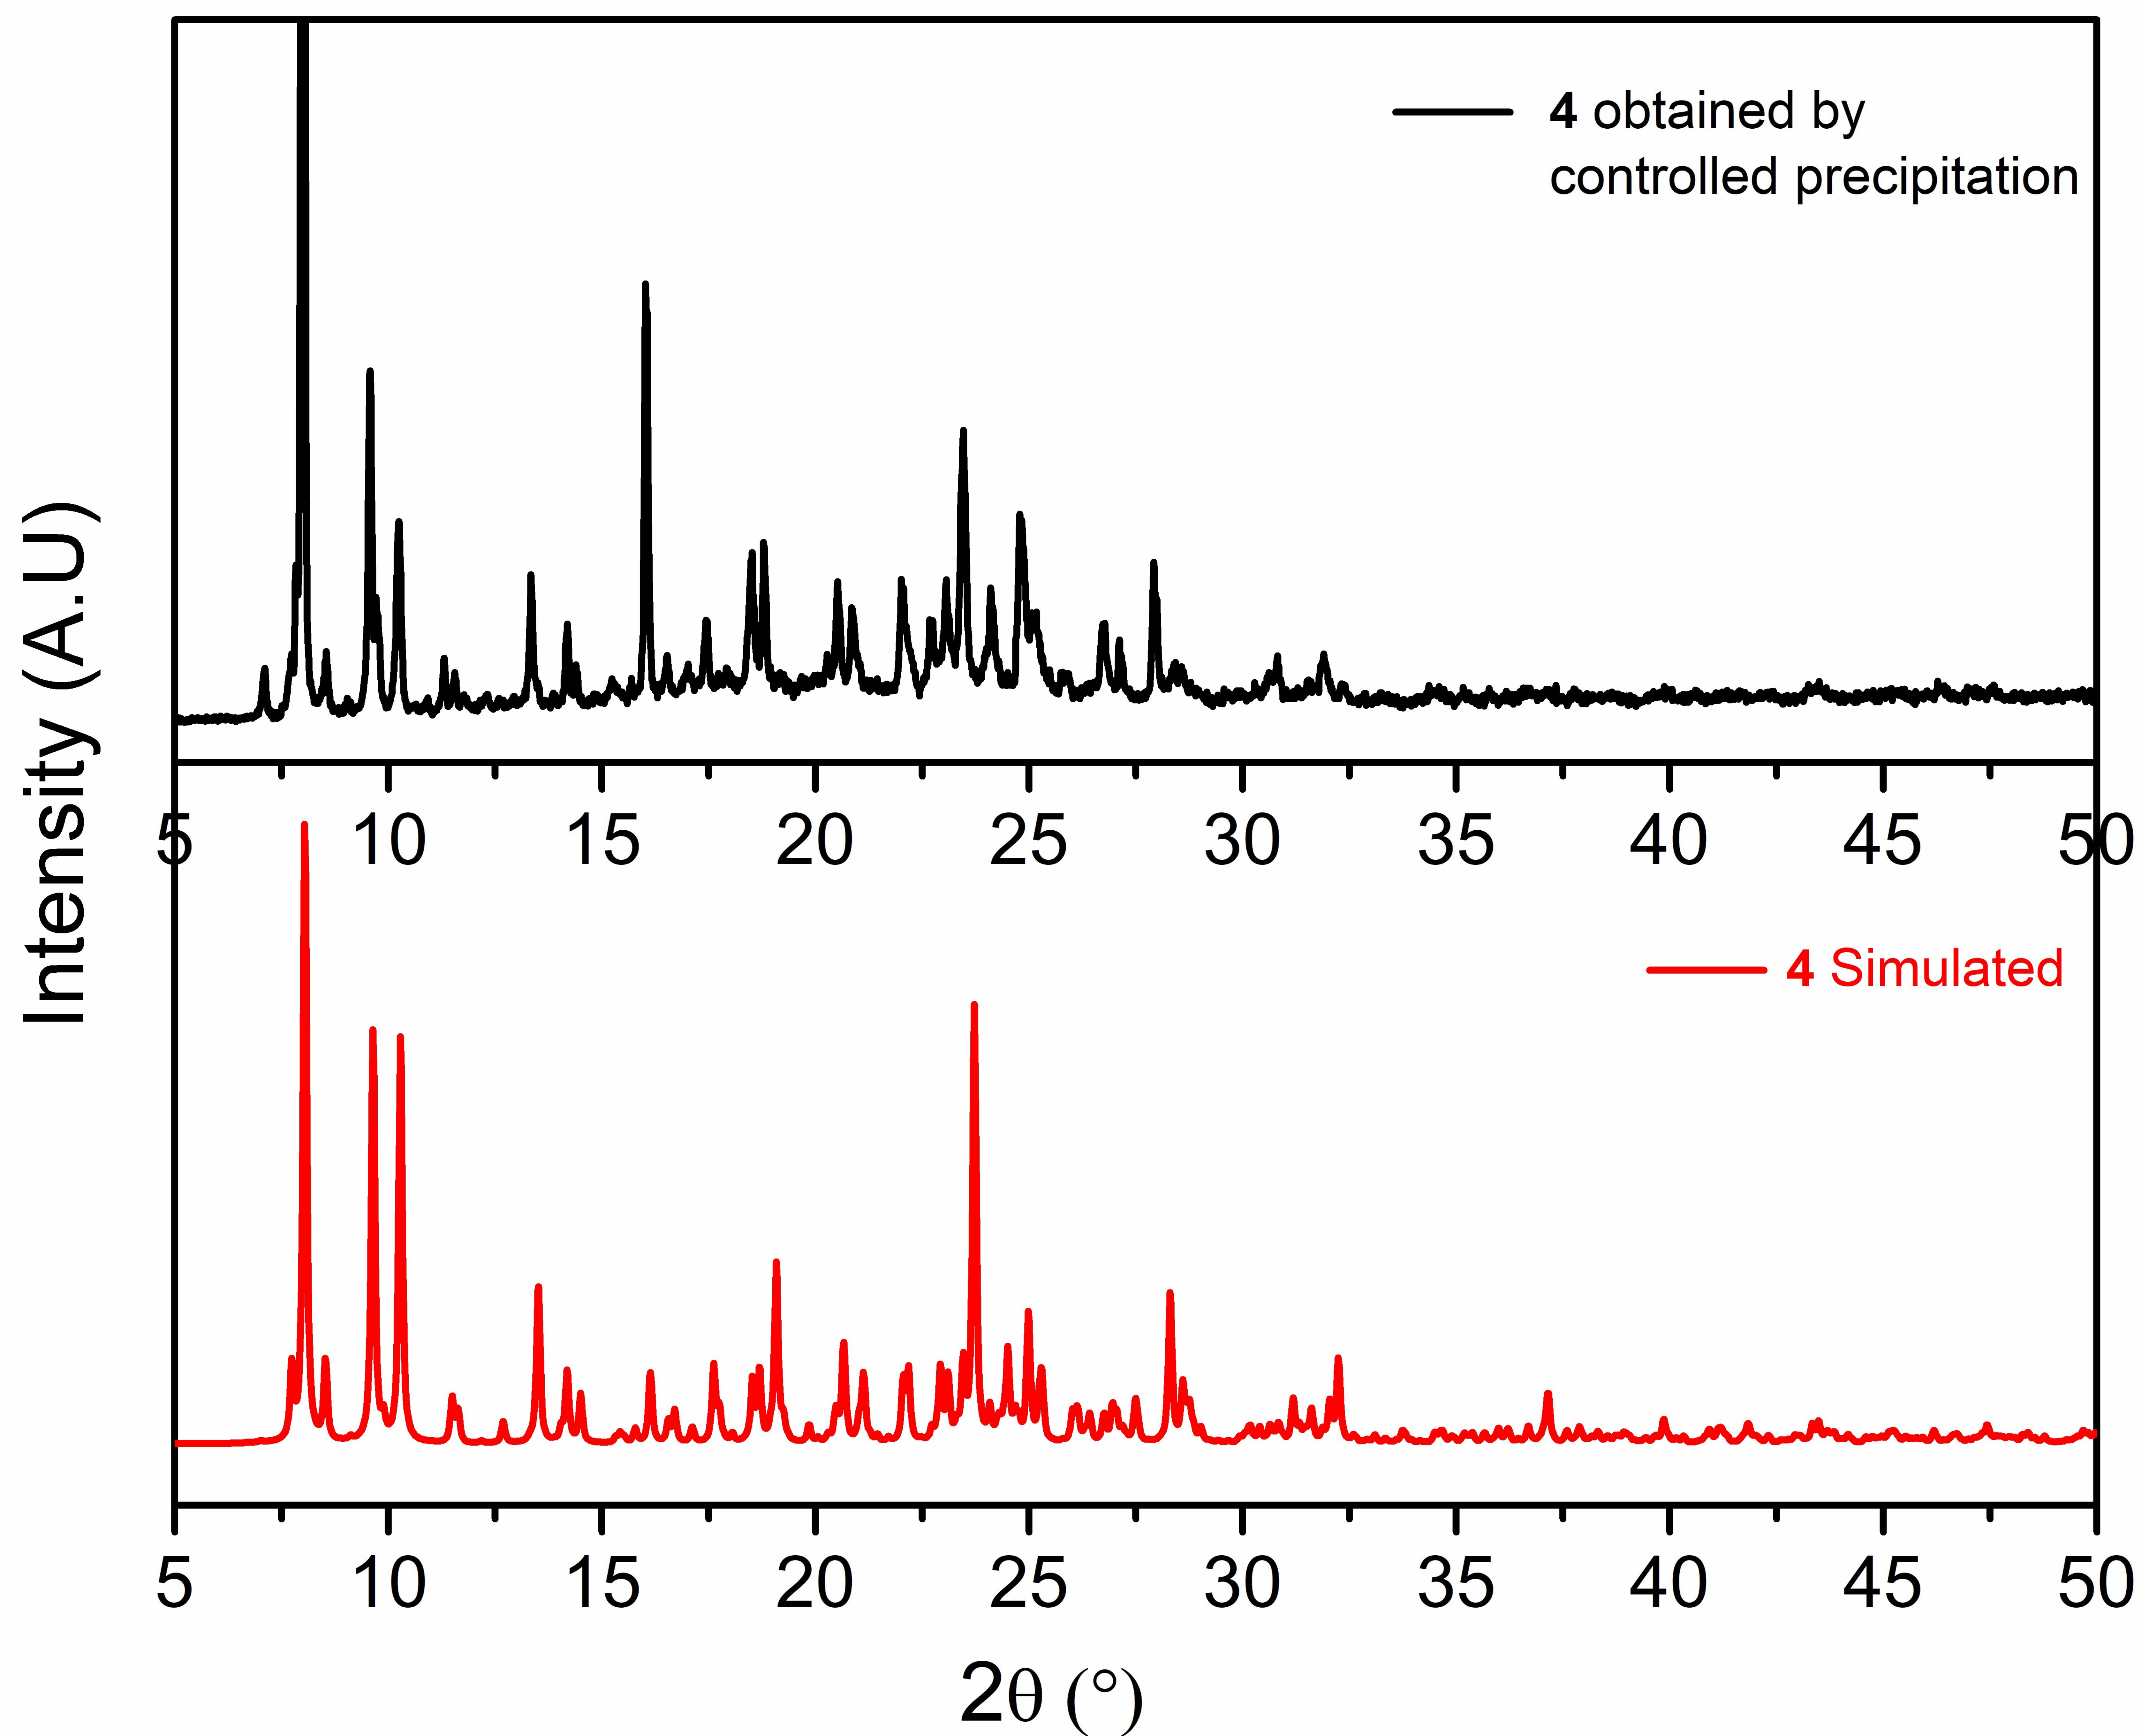

Supplement: d0nj02823a3.pdf [file d0nj02823a3.pdf]
